# Supplementary material for: Towards Automated Synthesis of Executable Eclipse Tutorials.
Source: Royal Society of Chemistry journal article supplement (doi:10.1039/d4ra03880k), 2010-01-01
Supplement: d4ra03880k1.pdf [file d4ra03880k1.pdf]

# **Supplementary Information**

## **Efficient and accurate detection of GC-associated miR-96-5p using a competitive lateral flow method based on SERS**

Long Jia<sup>a#</sup>, Yongxia Liu<sup>b#</sup>, Yanqing Zhang<sup>a</sup>, Shuofeng Zhang<sup>a</sup>, Xiaowei Cao<sup>a</sup>, Yemin Xu<sup>a</sup>, Yi Zhao<sup>a</sup>, and Bin Deng<sup>\*c</sup>

<sup>a</sup>Clinical Medical College, Yangzhou University, Yangzhou 225001, China

<sup>b</sup>Department of Gastroenterology, Traditional Chinese Medicine Hospital of Tongzhou District, Nantong, 8 Jianshe Road, Nantong 226300, China

<sup>c</sup>Department of Gastroenterology, Northern Jiangsu People's Hospital Affiliated to Yangzhou University, Yangzhou 225001, China

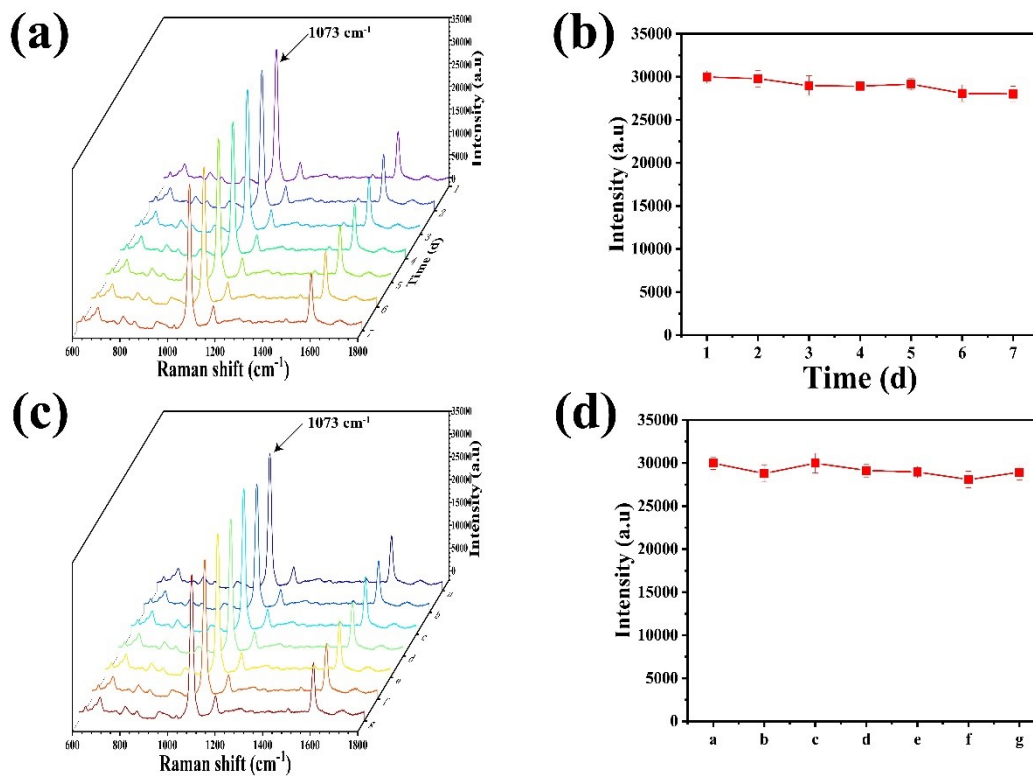

**Fig.S1** (a) SERS spectra of the Raman reporter gene were measured for seven consecutive days, (b) Raman intensity of the Raman reporter gene at  $1073 \text{ cm}^{-1}$  was measured for seven consecutive days, (c) SERS spectra of the Raman reporter gene were measured for different batches (a, b, c, d, e, f and g), (d) Raman intensity was measured at  $1073 \text{ cm}^{-1}$  for different batches.

**Table S1** SERS and qRT-PCR results of clinical serum samples from 30 healthy subjects.

|                   | SERS (pM) | qRT-PCR (pM) | Relative error (%) |
|-------------------|-----------|--------------|--------------------|
| Healthy subject1  | 0.054     | 0.052        | 3.846              |
| Healthy subject2  | 0.134     | 0.119        | 12.605             |
| Healthy subject3  | 0.182     | 0.187        | -2.674             |
| Healthy subject4  | 0.104     | 0.112        | -7.143             |
| Healthy subject5  | 0.011     | 0.012        | -8.333             |
| Healthy subject6  | 0.021     | 0.023        | -8.696             |
| Healthy subject7  | 0.028     | 0.026        | 7.692              |
| Healthy subject8  | 0.049     | 0.048        | 2.083              |
| Healthy subject9  | 0.163     | 0.171        | -4.678             |
| Healthy subject10 | 0.041     | 0.047        | -12.766            |
| Healthy subject11 | 0.032     | 0.031        | 3.226              |
| Healthy subject12 | 0.151     | 0.149        | 1.342              |
| Healthy subject13 | 0.009     | 0.01         | -10                |
| Healthy subject14 | 0.012     | 0.011        | 9.091              |
| Healthy subject15 | 0.056     | 0.061        | -8.197             |
| Healthy subject16 | 0.105     | 0.115        | -8.696             |
| Healthy subject17 | 0.095     | 0.105        | -9.524             |
| Healthy subject18 | 0.016     | 0.015        | 6.667              |
| Healthy subject19 | 0.041     | 0.042        | -2.381             |
| Healthy subject20 | 0.014     | 0.013        | 7.692              |
| Healthy subject21 | 0.021     | 0.023        | -8.696             |
| Healthy subject22 | 0.008     | 0.009        | -11.111            |
| Healthy subject23 | 0.043     | 0.046        | -6.522             |
| Healthy subject24 | 0.012     | 0.013        | -7.692             |
| Healthy subject25 | 0.016     | 0.015        | 6.667              |
| Healthy subject26 | 0.041     | 0.043        | -4.651             |
| Healthy subject27 | 0.051     | 0.055        | -7.273             |
| Healthy subject28 | 0.053     | 0.058        | -8.621             |
| Healthy subject29 | 0.067     | 0.072        | -6.944             |
| Healthy subject30 | 0.014     | 0.015        | -6.667             |

**Table S2** SERS and qRT-PCR results of clinical serum samples from 30 patients with mild intraepithelial neoplasia.

|       | SERS (pM) | qRT-PCR (pM) | Relative error (%) |
|-------|-----------|--------------|--------------------|
| Mild1 | 0.901     | 0.806        | 11.787             |
| Mild2 | 0.302     | 0.298        | 1.342              |
| Mild3 | 0.417     | 0.409        | 1.956              |
| Mild4 | 0.199     | 0.204        | -2.451             |
| Mild5 | 0.209     | 0.215        | -2.791             |
| Mild6 | 0.294     | 0.289        | 1.730              |
| Mild7 | 0.304     | 0.312        | -2.564             |
| Mild8 | 1.315     | 1.205        | 9.129              |

|        |       |       |        |
|--------|-------|-------|--------|
| Mild9  | 0.786 | 0.781 | 0.640  |
| Mild10 | 0.712 | 0.618 | 15.210 |
| Mild11 | 0.621 | 0.628 | -1.115 |
| Mild12 | 1.653 | 1.454 | 13.686 |
| Mild13 | 1.531 | 1.424 | 7.514  |
| Mild14 | 1.102 | 1.098 | 0.364  |
| Mild15 | 1.423 | 1.218 | 16.831 |
| Mild16 | 0.898 | 0.989 | 9.201  |
| Mild17 | 0.976 | 0.971 | 0.515  |
| Mild18 | 0.845 | 0.84  | 0.595  |
| Mild19 | 1.568 | 1.391 | 12.725 |
| Mild20 | 1.617 | 1.498 | 7.944  |
| Mild21 | 0.845 | 0.749 | 12.817 |
| Mild22 | 0.974 | 0.969 | 0.516  |
| Mild23 | 1.021 | 0.915 | 11.585 |
| Mild24 | 0.746 | 0.741 | 0.675  |
| Mild25 | 1.158 | 1.061 | 9.142  |
| Mild26 | 1.134 | 1.031 | 9.990  |
| Mild27 | 0.986 | 0.979 | 0.715  |
| Mild28 | 1.647 | 1.538 | 7.078  |
| Mild29 | 1.117 | 1.098 | 1.730  |
| Mild30 | 1.121 | 1.020 | 9.901  |

**Table S3** SERS and qRT-PCR results of clinical serum samples from 30 patients with severe intraepithelial neoplasia.

|          | SERS (pM) | qRT-PCR (pM) | Relative error (%) |
|----------|-----------|--------------|--------------------|
| Severe1  | 1.744     | 1.804        | -3.326             |
| Severe2  | 2.576     | 2.325        | 10.796             |
| Severe3  | 1.746     | 1.623        | 7.579              |
| Severe4  | 1.476     | 1.587        | -6.994             |
| Severe5  | 1.298     | 1.205        | 7.718              |
| Severe6  | 1.685     | 1.559        | 8.082              |
| Severe7  | 1.545     | 1.643        | -5.965             |
| Severe8  | 1.682     | 1.774        | -5.186             |
| Severe9  | 1.471     | 1.384        | 6.286              |
| Severe10 | 1.374     | 1.411        | -2.622             |
| Severe11 | 1.318     | 1.201        | 9.742              |
| Severe12 | 1.418     | 1.518        | -6.588             |
| Severe13 | 1.748     | 1.854        | -5.717             |
| Severe14 | 1.854     | 1.977        | -6.222             |
| Severe15 | 1.754     | 1.911        | -8.216             |
| Severe16 | 1.278     | 1.418        | -9.873             |
| Severe17 | 1.357     | 1.491        | -8.987             |
| Severe18 | 2.558     | 2.608        | -1.917             |
| Severe19 | 2.478     | 2.558        | -3.127             |

|          |       |       |         |
|----------|-------|-------|---------|
| Severe20 | 2.142 | 2.214 | -3.252  |
| Severe21 | 2.209 | 2.315 | -4.579  |
| Severe22 | 2.237 | 2.401 | -6.830  |
| Severe23 | 2.207 | 2.407 | -8.309  |
| Severe24 | 2.107 | 2.267 | -7.058  |
| Severe25 | 1.617 | 1.718 | -5.879  |
| Severe26 | 1.624 | 1.801 | -9.828  |
| Severe27 | 1.496 | 1.569 | -4.653  |
| Severe28 | 1.215 | 1.402 | -13.338 |
| Severe29 | 1.815 | 1.973 | -8.008  |
| Severe30 | 1.391 | 1.497 | -7.081  |

**Table S4** SERS and qRT-PCR results of clinical serum samples from 30 patients with gastric cancer (GC).

|      | SERS (pM) | qRT-PCR (pM) | Relative error (%) |
|------|-----------|--------------|--------------------|
| GC1  | 3.255     | 3.095        | 5.169              |
| GC2  | 3.374     | 3.317        | 1.718              |
| GC3  | 2.785     | 2.643        | 5.373              |
| GC4  | 2.601     | 2.481        | 4.837              |
| GC5  | 2.498     | 2.381        | 4.914              |
| GC6  | 2.984     | 3.095        | -3.586             |
| GC7  | 2.834     | 2.614        | 8.416              |
| GC8  | 2.596     | 2.318        | 11.993             |
| GC9  | 2.376     | 2.491        | -4.617             |
| GC10 | 2.257     | 2.107        | 7.119              |
| GC11 | 3.385     | 3.493        | -3.092             |
| GC12 | 3.867     | 3.619        | 6.853              |
| GC13 | 3.512     | 3.291        | 6.715              |
| GC14 | 3.387     | 3.207        | 5.613              |
| GC15 | 3.192     | 3.031        | 5.312              |
| GC16 | 3.542     | 3.351        | 5.700              |
| GC17 | 3.356     | 3.583        | -6.335             |
| GC18 | 3.218     | 3.019        | 6.592              |
| GC19 | 3.215     | 3.091        | 4.012              |
| GC20 | 3.297     | 3.012        | 9.462              |
| GC21 | 3.587     | 3.319        | 8.075              |
| GC22 | 3.479     | 3.219        | 8.077              |
| GC23 | 3.352     | 3.109        | 7.816              |
| GC24 | 3.648     | 3.492        | 4.467              |
| GC25 | 3.841     | 3.613        | 6.311              |
| GC26 | 3.672     | 3.415        | 7.526              |
| GC27 | 3.849     | 3.673        | 4.792              |
| GC28 | 3.556     | 3.289        | 8.118              |
| GC29 | 3.499     | 3.209        | 9.037              |
| GC30 | 3.468     | 3.318        | 4.521              |
